# Supplementary material
Source: bioRxiv or medRxiv preprint supplement (https://medrxiv.org/content/medrxiv/early/2023/02/23/2023.02.22.23286290/DC1/embed/media-1.pdf)
Supplement: Supplementary file [file media-1.pdf]

## MAP

| STRUCTURAL                                                                                                            | CHANGING STAFF BEHAVIOUR                                                                                                                                                                    | CHANGING COMMUNITY PROVISION                                                                                                                                                                                                                                                                                                                                                 | MODELLING                                        |
|-----------------------------------------------------------------------------------------------------------------------|---------------------------------------------------------------------------------------------------------------------------------------------------------------------------------------------|------------------------------------------------------------------------------------------------------------------------------------------------------------------------------------------------------------------------------------------------------------------------------------------------------------------------------------------------------------------------------|--------------------------------------------------|
| <b>S - Bed Management</b><br>Care Quality commission (2021)<br>Peddie (2018)<br>Tampubolon (2018) (systematic review) | <b>CSB - Clinical Audit</b>                                                                                                                                                                 | <b>CCP - Care Home</b><br>Coleman et al (2020)<br>Hanratty et al (2019) (Rapid Evidence Synthesis)<br>Matthews et al (2019)<br>NHS England & NHS Improvement (2016).<br>Case Studies: Capewell (2021) and Local Government Association. 2018.                                                                                                                                | Excluded from Scope                              |
| <b>S - Communication &amp; Team Working</b><br>Devine (2021)<br>Local Government Association (2018)                   | <b>CSB - Education of Staff</b><br>Wall (2021)                                                                                                                                              | <b>CCP - Community Teams</b><br>Windle (2014)<br>Rodman (2021)<br>Charles (2018)<br>Local Government Association. 2018. High Impact Change Model<br>Durham: multi-disciplinary multi-agency discharge teams                                                                                                                                                                  | <b>WORKFORCE PLANNING</b><br>Excluded from Scope |
| <b>S - Digital and Data</b><br>NHS Confederation (2018)<br>Devine (2021)<br>Wilkinson (2018)                          | <b>CSB - Protocols/Guidelines</b><br>Unnewehr (2015) (systematic review)                                                                                                                    | <b>CCP - Home Care</b><br>Mackintosh (2016)<br>Atkin (2022)<br>Collaboration in Urgent and Emergency Care<br>Edinburgh Integration Joint Board (2020)<br>Shepperd (2022) RCT<br>Leong, 2021 (SRoR)<br>Waddington & Henwood (2003)<br>Hollinghurst (2020)<br>Wolton (2018)<br>Care & Repair <a href="https://www.careandrepair.org.uk/">https://www.careandrepair.org.uk/</a> |                                                  |
| <b>S - Discharge Co-ordinators</b><br>Gonçalves-Bradley (2022) (systematic review)                                    | <b>CSB - Quality Improvement Programmes</b><br>NHS Confederation (2022)                                                                                                                     | <b>CCP - Hospital Avoidance</b><br>Windle (2014) Evaluation Report<br>Oliver (2019)<br>NICE guideline 82 (2017)<br>HART Report (2018/2019)<br>Local Government Association: High Impact Change Model (Change 3): Multi-disciplinary teams.<br>Lincolnshire: hospital avoidance response team                                                                                 |                                                  |
| <b>S - Discharge To Assess</b><br>Edinburgh Integrated Joint Board (2021)<br>Local Government Association 2018        | <b>CSB - Quality Management Systems</b>                                                                                                                                                     | <b>CCP - Other Agencies</b><br>Mahmood (2020)                                                                                                                                                                                                                                                                                                                                |                                                  |
| <b>S - Extra Service Delivery</b><br>Academy of Medical Sciences (2020)<br>Yennaram (2020)                            | <b>INTEGRATED CARE</b>                                                                                                                                                                      | <b>CCP - Private Sector</b><br>Clark (2020)                                                                                                                                                                                                                                                                                                                                  |                                                  |
| <b>S - Governance</b><br>Zonneveld 2018 (systematic review)                                                           | <b>CCP - Integrated Care</b><br>Edinburgh Integration Joint Board (2020)<br>Local Government Association 2018<br>Coleman et al (2020)<br>Charles (2018)<br>Wilkinson (2018)<br>Hayes (2017) | <b>CCP - Rapid Response/See and Treat</b><br>Windle et al (2014) – Evaluation Report<br>Ellis (2005)<br>Woodward & Procter (2016) (Rapid Review)<br>Mahase (2022)<br>McGavock (2020)<br>McNamara (2020)<br>Academy of Royal Medical Colleges (2020)                                                                                                                          |                                                  |
| <b>S - Managed Care Approaches</b><br>Baxter 2018 (systematic review)                                                 | <b>TARGETING CARERS</b><br>Capewell (2021)<br>Walters (2021)<br>Department of Health & Social Care<br>Guidance - Hospital discharge and community support guidance<br>Updated 1 July 2022   | <b>CCP - Rehabilitation, Recovery and Reablement</b><br>SCIE research briefing 36<br>Ariss (2015) (Literature review)<br>Charles (2018)<br>Gilbert (2000)<br>Dedeu (2016)<br>Edinburgh Integration Joint Board (2020)                                                                                                                                                        |                                                  |
| <b>S - Monitoring and Review</b><br>Goodison (2021)                                                                   |                                                                                                                                                                                             | <b>CCP - Single Point Response</b><br>Evans (2017)<br>Edinburgh Integration Joint Board (2020)                                                                                                                                                                                                                                                                               |                                                  |

**S - Patient Flow**

Goodison (2021)  
NHS Providers (2019)  
Ritchie (2021)

**S - Policies**

Care Quality Commission (2021)

**S - Prioritisation and Triage**

Devine (2021)  
Khan (2022)  
NHS Providers (2019)

**S - Same Day Services**

Atkin (2022)  
Jones (2018)  
NHS Confederation (2021)  
NHS Providers (2019)  
Care Quality Commission (2022)  
Eardley (2022)  
The Academy of Medical Sciences (2021)

**S - Seven Day Services** Local

Government Association (2018)

**S - Specialist Units**

Cooper (2019)  
Eardley (2022)  
Edinburgh Integration Joint Board (2021)  
NHS Providers (2019)  
NHS Southport and Formby CCG (2015)  
Peddie (2018)  
Reid (2016) (systematic review)  
Rodman (2021)  
Srikumar (2021)  
van Galen (2017) (systematic review)

**S - Staff Redeployment**

Care Quality Commission (2022)  
Ferguson (2020)  
Rickards (2021)  
Scriven (2018)  
Wilkinson (2018)  
Atey (2022) (systematic review)  
Hohl (2015) (systematic review)  
San Juan (2022) (systematic review)

**S - Volunteers**

Nelson (2021) (Scoping review protocol)  
Wilkinson (2018)

**CCP - Social Care**

Department of Health & Social Care Guidance.  
Hospital discharge and community support guidance. Updated 1 July 2022  
Edinburgh Integration Joint Board (2020)  
Charles (2018)  
Renfrewshire/Adult-Social-Care

**CCP - Step Down Beds**

Edinburgh Integration Joint Board (2020)  
Department of Health & Social Care Guidance.  
Hospital discharge and community support guidance. Updated 1 July 2022  
Charles (2018)  
Walters (2021)

**CCP - Step Up Facilities****CCP - Telecare**

Academy of Royal Medical Colleges (2020)  
Edinburgh Integration Joint Board (2020)  
Collaboration in Urgent and Emergency Care  
Atkin (2022)  
Matthews et al (2019)  
Managing long term conditions remotely in the north west  
Remote monitoring for care home residents across London  
Remote monitoring for patients with chronic conditions in the Midlands

**CCP - Virtual Hospital/Virtual Ward**

Lillie & Wenzel (2019)  
Atkin (2022)

**CCP - Voluntary Services**

Waddington & Henwood (2003)  
NHS Providers (2017)
